# Supplementary material
Source: PubMed Central journal article supplement (PMC6878978)
Supplement: NIHMS1505398-supplement-8.pdf [file NIHMS1505398-supplement-8.pdf]

### Supplementary Tables

Supplementary Table S1. Primary antibodies for Western blot analysis

Supplementary Table S2. Primary antibodies for immunohistochemistry analysis

Supplementary Table S3. Primary antibodies for Flow Cytometry analysis

Supplementary Table S4. Chemical agents and their target

#### Supplementary Table S1. Primary antibodies for Western blot analysis

| Primary antibodies | Supplier                  | Species | Catalog Number |
|--------------------|---------------------------|---------|----------------|
| Phospho-Erk        | Cell signaling technology | Rabbit  | 4376           |
| Total-Erk          | Cell signaling technology | Rabbit  | 5013           |
| Phospho-Stat3      | Cell signaling technology | Rabbit  | 9145           |
| Total-Stat3        | Cell signaling technology | Mouse   | 9139           |
| Phospho-EGFR       | Cell signaling technology | Rabbit  | 3777           |
| Total-EGFR         | Millipore                 | Rabbit  | 06-847         |
| Phospho-TACE       | Abcam                     | Rabbit  | ab182630       |
| Total-TCAE         | Millipore                 | Rabbit  | ab19027        |
| Actin              | Cell signaling technology | Mouse   | 3700           |
| Tubulin            | Cell signaling technology | Rabbit  | 5666           |

#### Supplementary Table S2. Primary antibodies for immunohistochemistry analysis

| Primary antibodies | Supplier                  | Species | Catalog Number |
|--------------------|---------------------------|---------|----------------|
| Phospho-Erk        | Cell signaling technology | Rabbit  | 4376           |
| Phospho-Stat3      | Cell signaling technology | Rabbit  | 9145           |
| Ki67               | Abcam                     | Rabbit  | ab15580        |
| Cytokeratin19      | Abcam                     | Rabbit  | ab15463        |
| Collagen 1         | Rockland                  | Rabbit  | 600-401-D19    |
| pEGFR              | Cell signaling technology | Rabbit  | 3777           |

**Supplementary Table S3. Primary antibodies for Flow Cytometry analysis**

| <b>Primary antibodies</b>          | <b>Supplier</b> | <b>Species</b> | <b>Catalog Number</b> |
|------------------------------------|-----------------|----------------|-----------------------|
| anti-CD45 conjugated to microbeads | Miltenyi Biotec | Mouse          | 130-052-301           |
| EpCAM-FITC conjugated              | Biolegend       | Mouse          | 118210                |
| CD24-PE conjugated                 | Biolegend       | Mouse          | 138503                |
| CD44-eFluor450 conjugated          | Biolegend       | Mouse          | 103039                |
| CD133-APC conjugated               | Biolegend       | Mouse          | 141208                |

**Supplementary Table S4. Chemical agents and their target**

| <b>Chemical agents</b> | <b>Supplier</b>       | <b>Target</b>          |
|------------------------|-----------------------|------------------------|
| AZD1480                | AstraZeneca           | JAK2                   |
| AZD6244                | AstraZeneca           | MEK1/2                 |
| MEK162                 | Novartis              | MEK1/2                 |
| Stattic                | Calbiochem            | STAT3                  |
| U0126                  | Selleck Chemicals     | MEK1/2                 |
| Erlotinib              | Selleck Chemicals     | EGFR                   |
| Gemcitabine            | Eli Lilly             | Nucleic acid synthesis |
| C225 (cetuximab)       | Vanderbilt University | EGFR                   |
