# Supplementary material
Source: PubMed Central journal article supplement (PMC6878978)

**A**

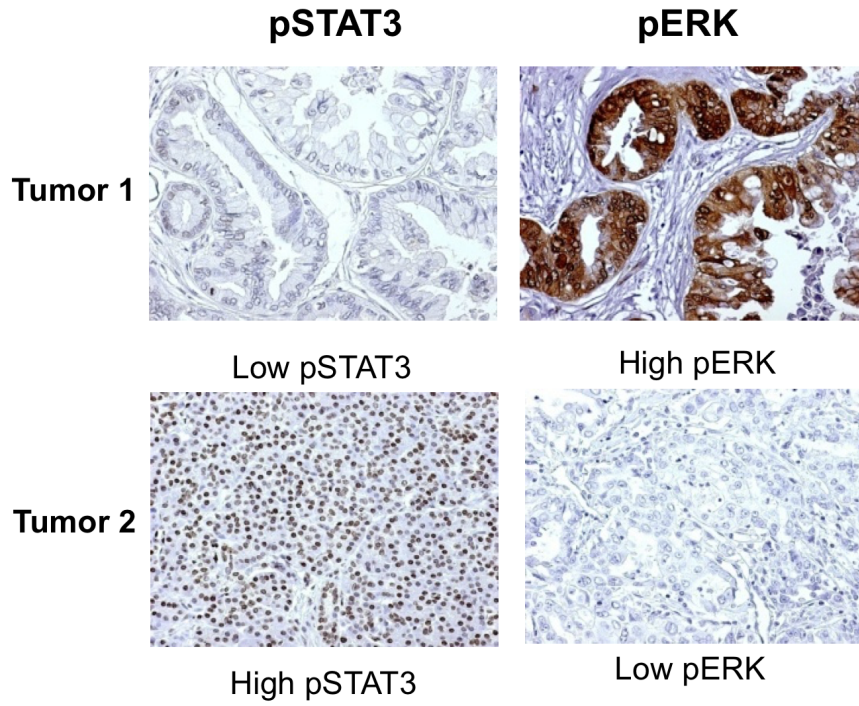

**B**

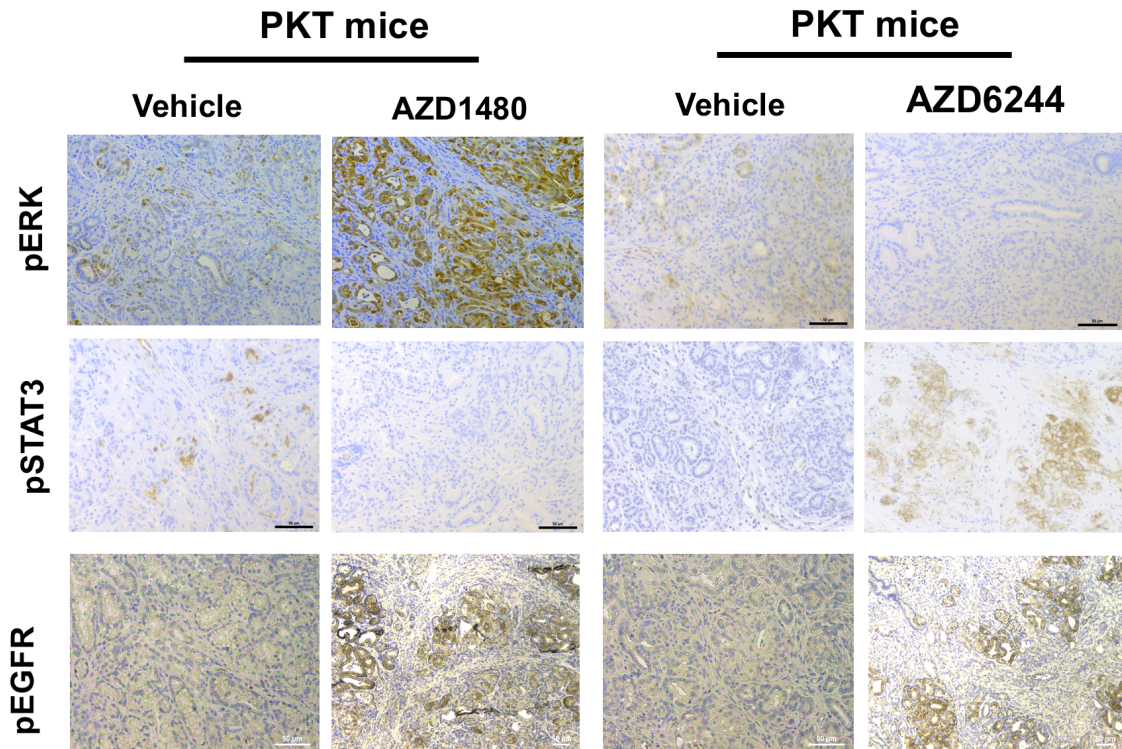

Supplement: NIHMS1505398-supplement-2.pdf [file NIHMS1505398-supplement-2.pdf]

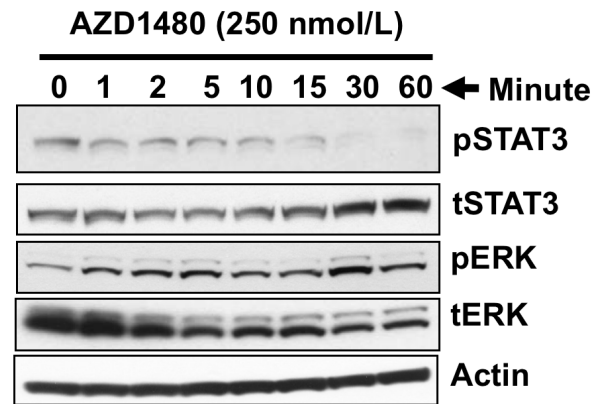

Supplementary Figure S2

Supplement: NIHMS1505398-supplement-3.pdf [file NIHMS1505398-supplement-3.pdf]

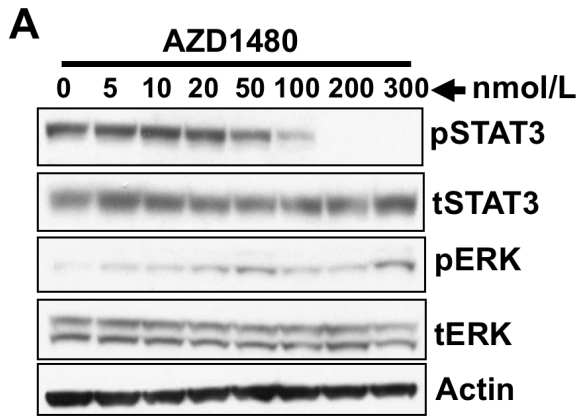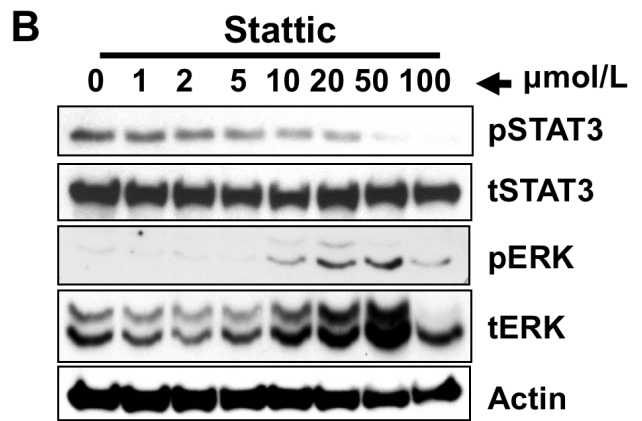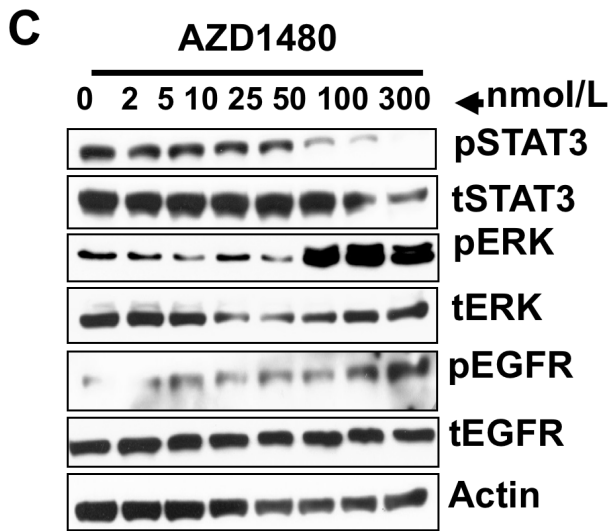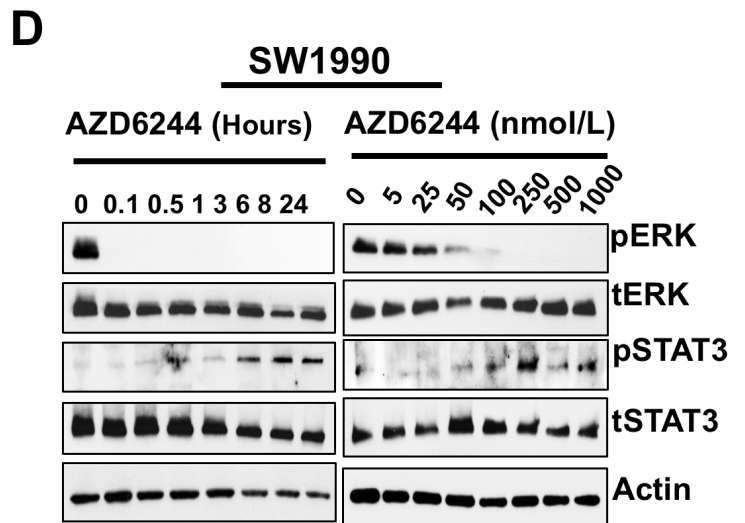

Supplementary Figure S3

Supplement: NIHMS1505398-supplement-4.pdf [file NIHMS1505398-supplement-4.pdf]

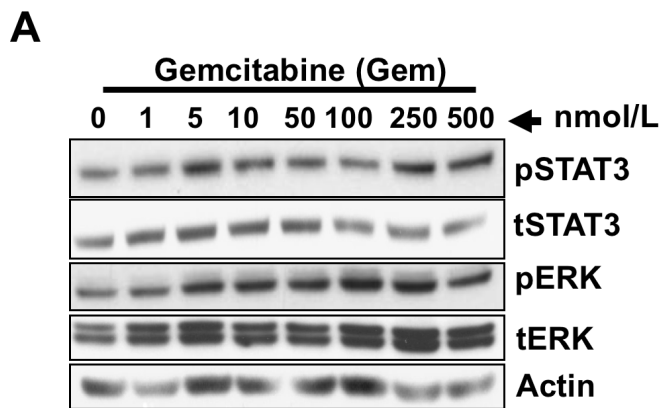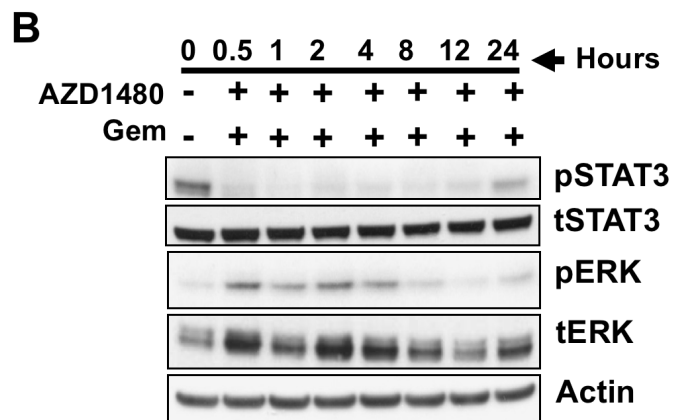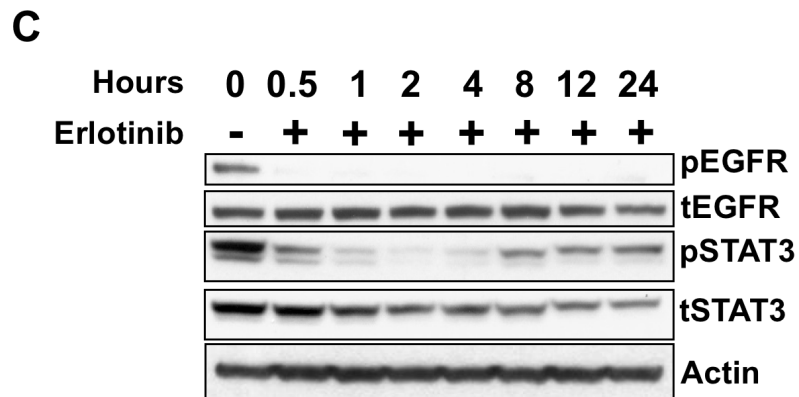

Supplementary Figure S4

Supplement: NIHMS1505398-supplement-5.pdf [file NIHMS1505398-supplement-5.pdf]

**PANC1 cells**

**AREG (100 ng/ml)**

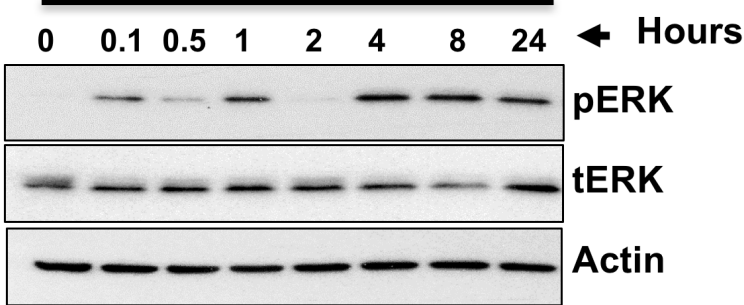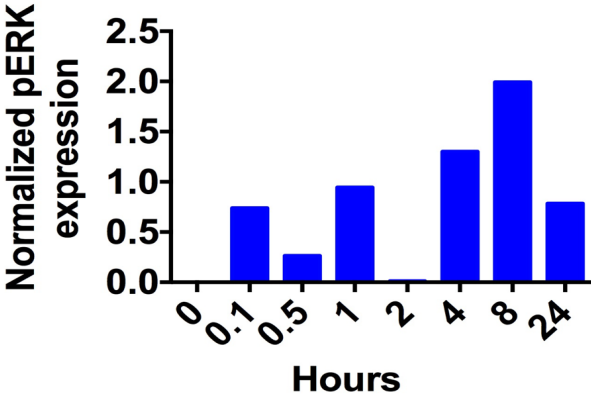

Supplementary Figure S5

Supplement: NIHMS1505398-supplement-6.pdf [file NIHMS1505398-supplement-6.pdf]

**A****PANC1**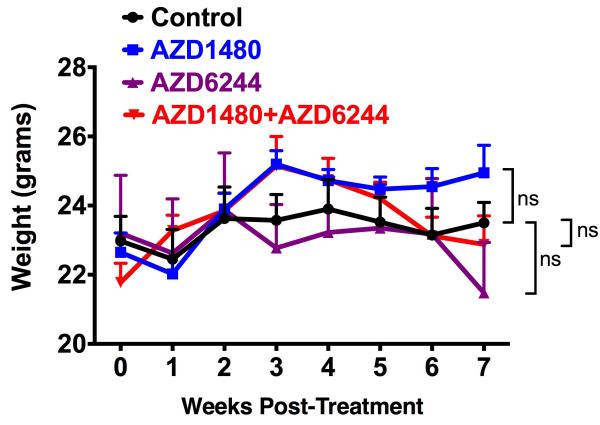**B****MiaPaCa2**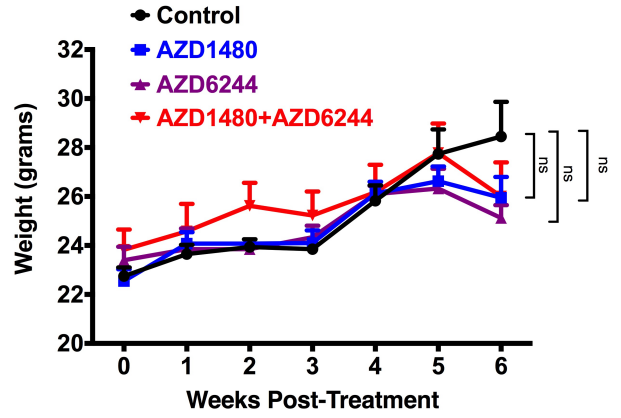**Supplementary Figure S6**

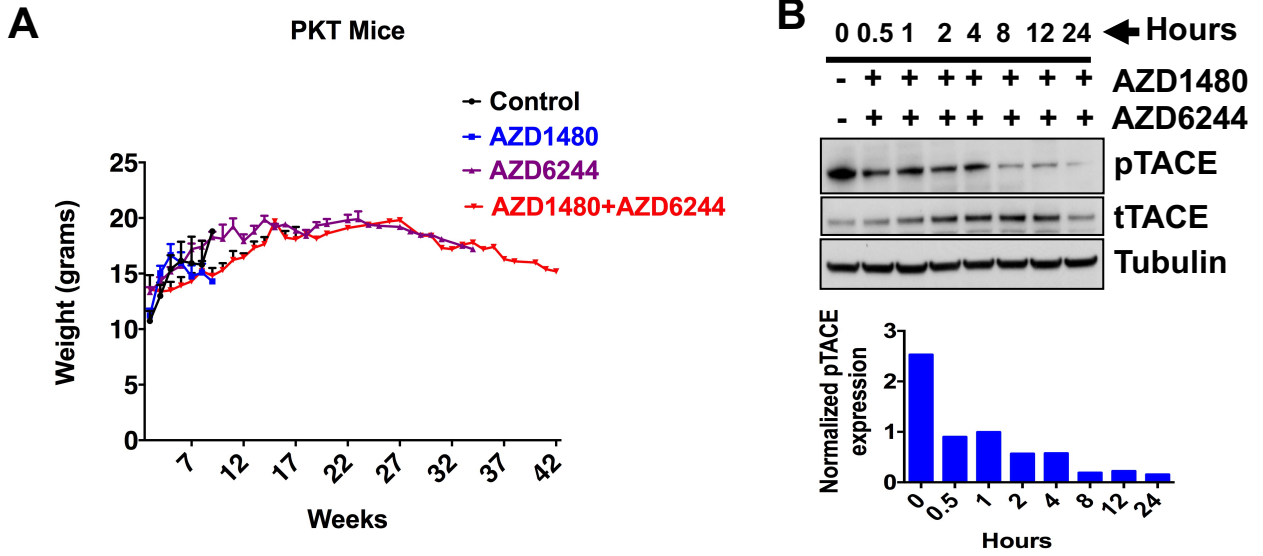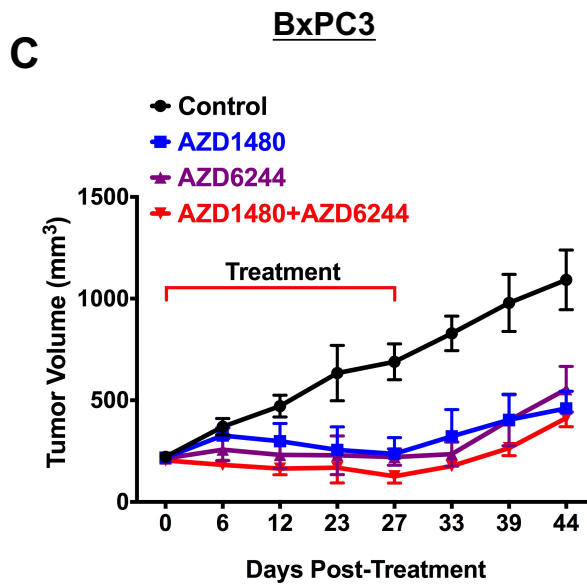

Supplementary Figure S7

Supplement: NIHMS1505398-supplement-7.pdf [file NIHMS1505398-supplement-7.pdf]
